# Supplementary material for: Unexpected effects of the alteration of structure and stability of myoglobin and hemoglobin in ammonium-based ionic liquids
Source: Royal Society of Chemistry journal article supplement (doi:10.1039/c3cp54398f), 2013-12-18
Supplement: c3cp54398f.pdf [file c3cp54398f.pdf]

## Supporting Information

### Unexpected effects of the alteration of structure and stability of myoglobin and hemoglobin in ammonium-based ionic liquids

Indrani Jha<sup>a</sup>, Pankaj Attri<sup>b</sup> and Pannuru Venkatesu<sup>a,\*</sup>

<sup>a</sup> Department of Chemistry, University of Delhi, Delhi – 110007, India

<sup>b</sup> Plasma Bioscience Research Centre/ Department of Electrical and Biological Physics,  
Kwangju University, Seoul, Korea, 139-791

Corresponding Author

\*e-mail: venkatesup@hotmail.com; pvenkatesu@chemistry.du.ac.in; Tel:+91-11-  
27666646-142; Fax: +91-11-2766 6605.

The fluorescence intensity of Mb in the presence of buffer and ammonium-based ILs as a  
function of temperature.

**Fig. 1S-5S.**

The fluorescence intensity of Hb in the presence of buffer and ammonium-based ILs as a  
function of temperature.

**Fig. 6S-10S.**

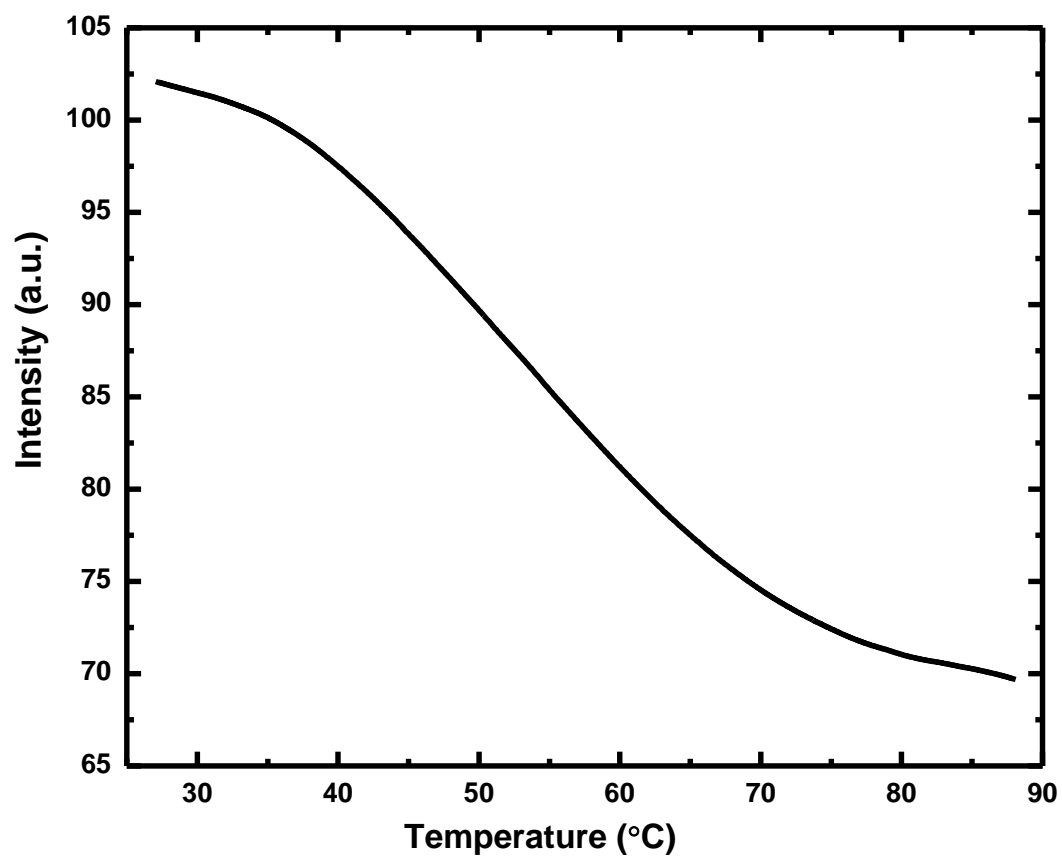

**Fig. 1S** The fluorescence intensity of Mb in the presence of buffer.

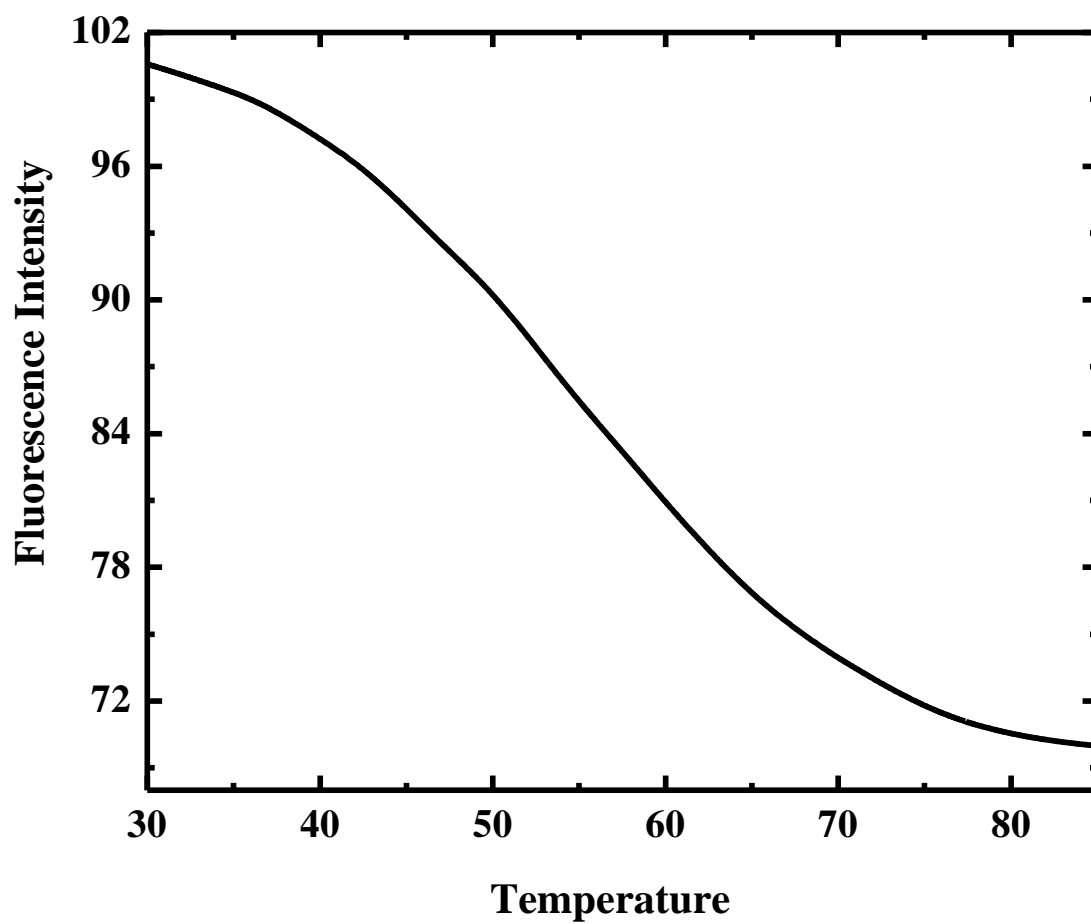

**Fig. 2S** The fluorescence intensity of Mb in the presence of TMAH.

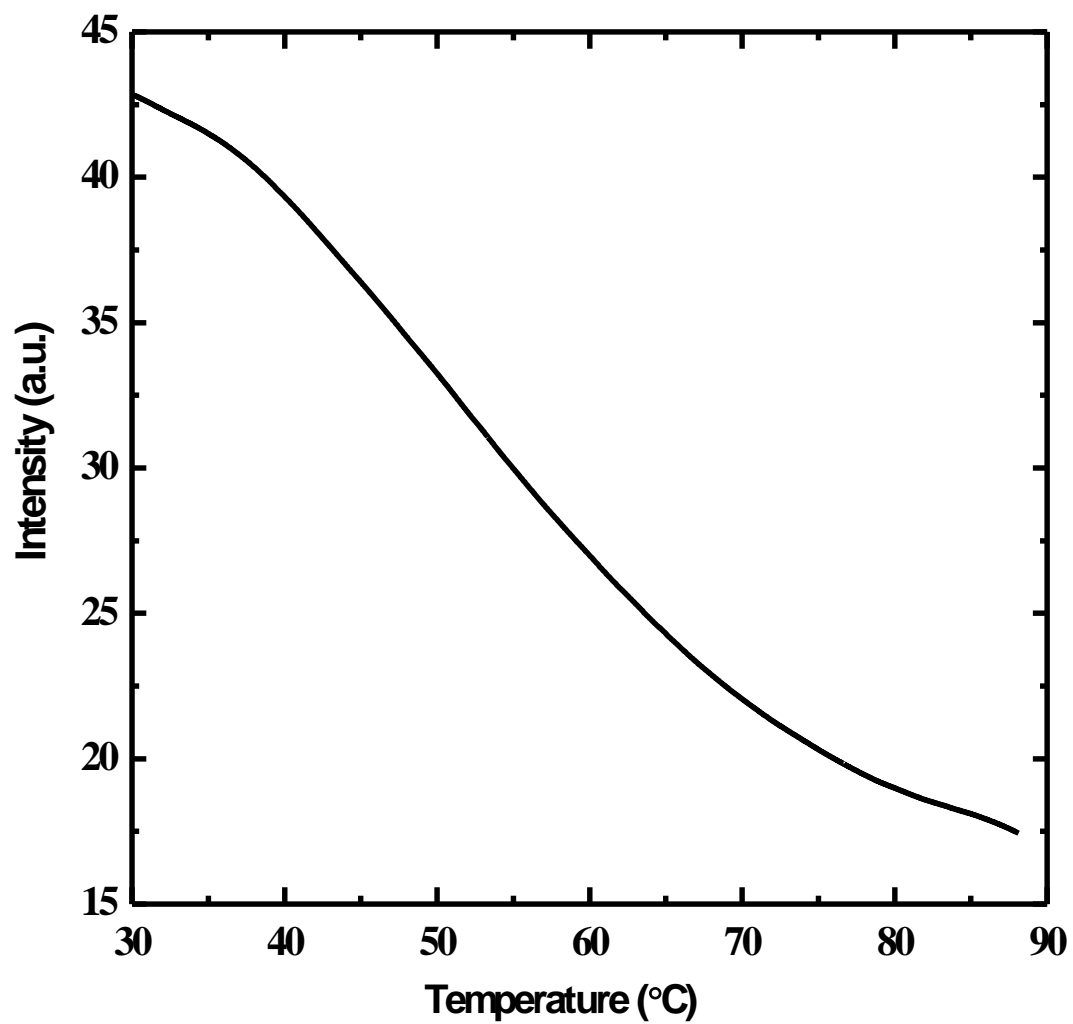

**Fig. 3S** The fluorescence intensity of Mb in the presence of TEAH.

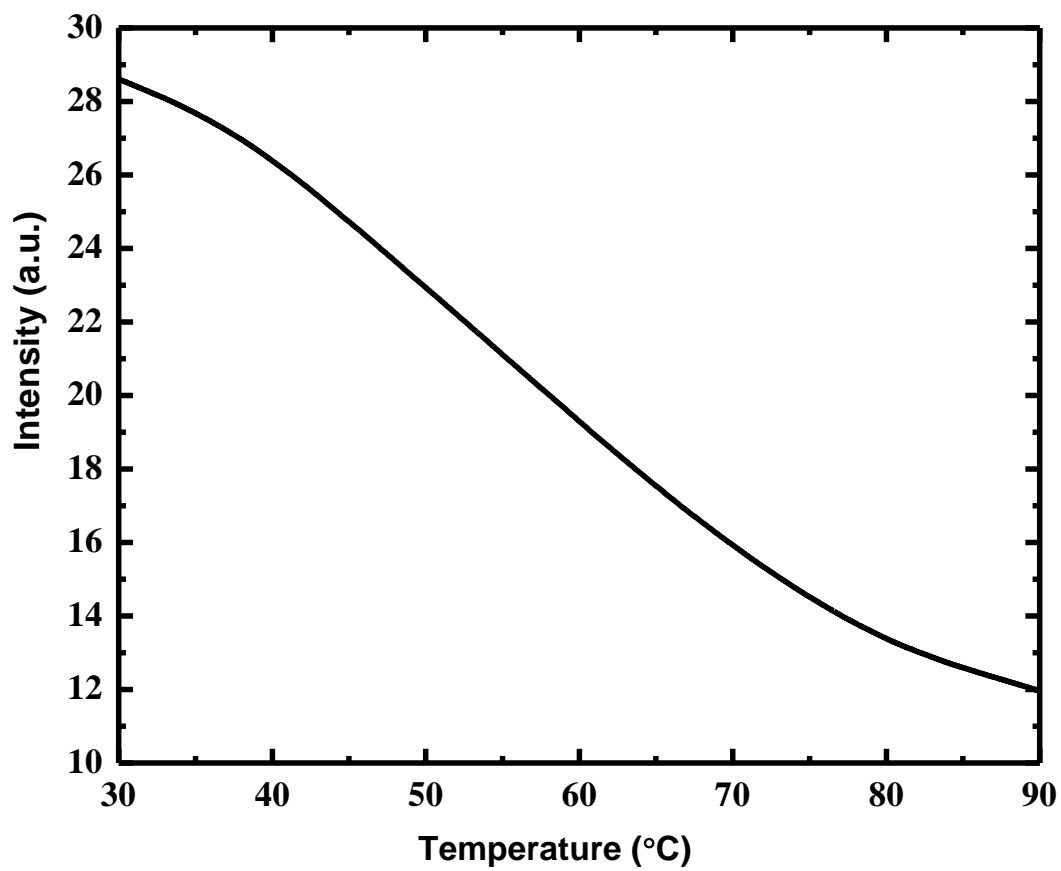

**Fig. 4S** The fluorescence intensity of Mb in the presence of TPAH.

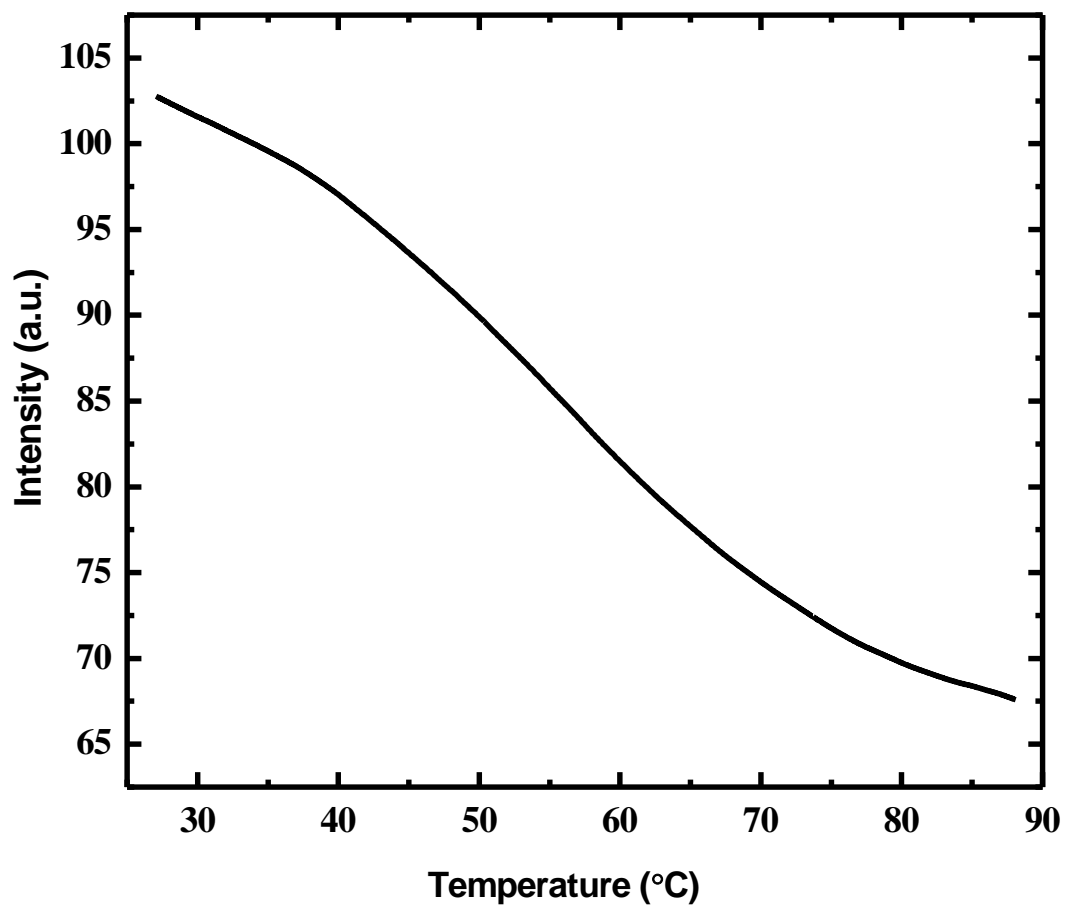

**Fig. 5S** The fluorescence intensity of Mb in the presence of TBAH.

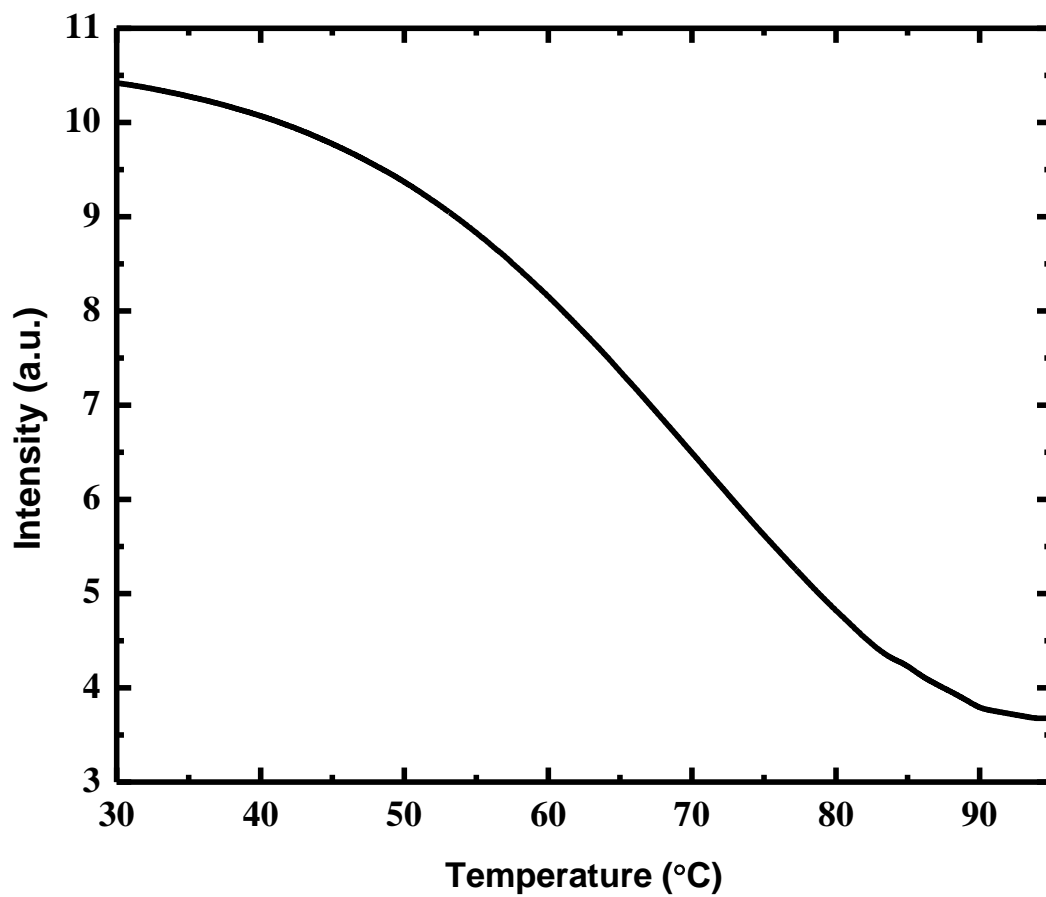

**Fig. 6S** The fluorescence intensity of Hb in the presence of Buffer.

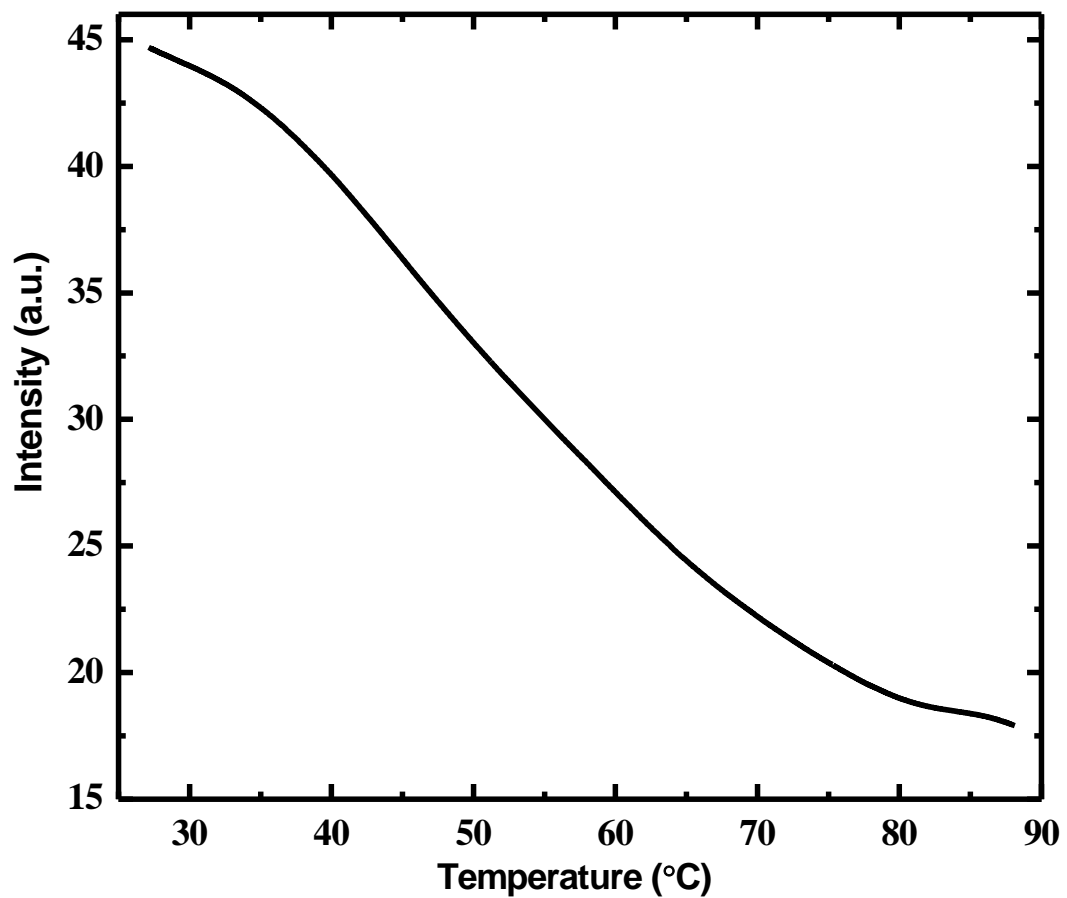

**Fig.7S** The fluorescence intensity of Hb in the presence of TMAH.



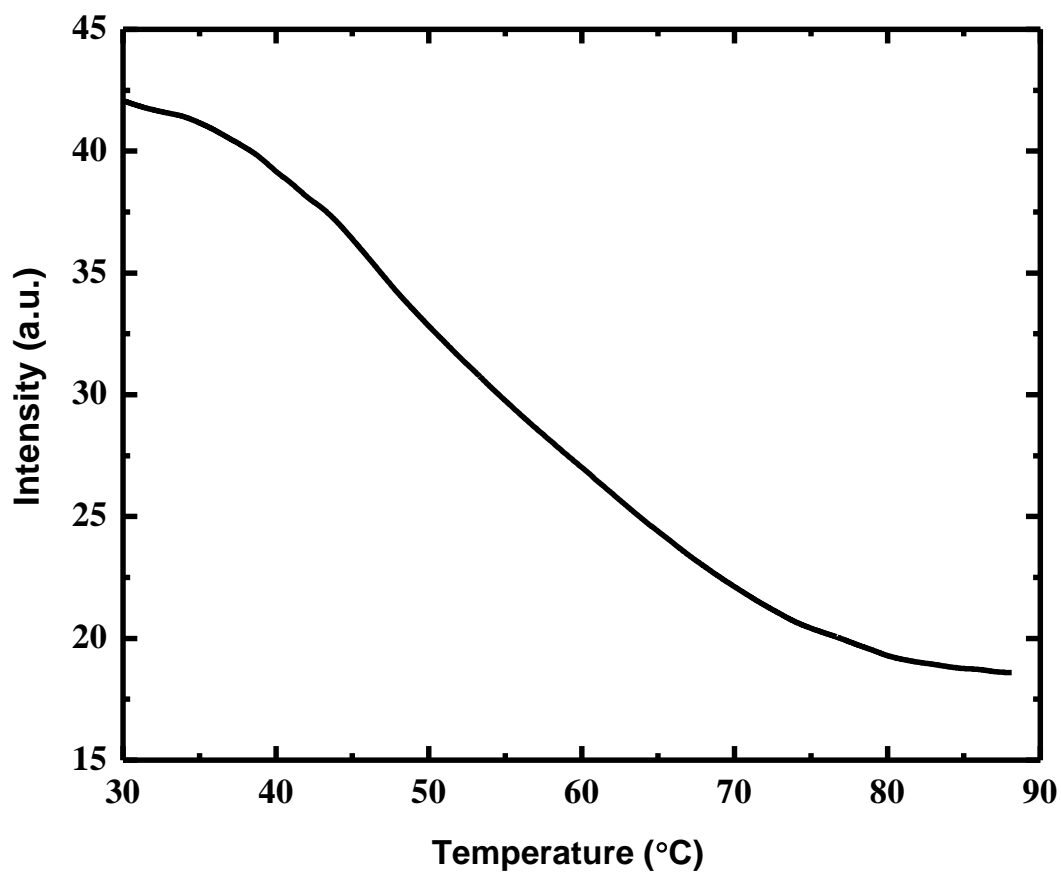

**Fig. 8S** The fluorescence intensity of Hb in the presence of TEAH.

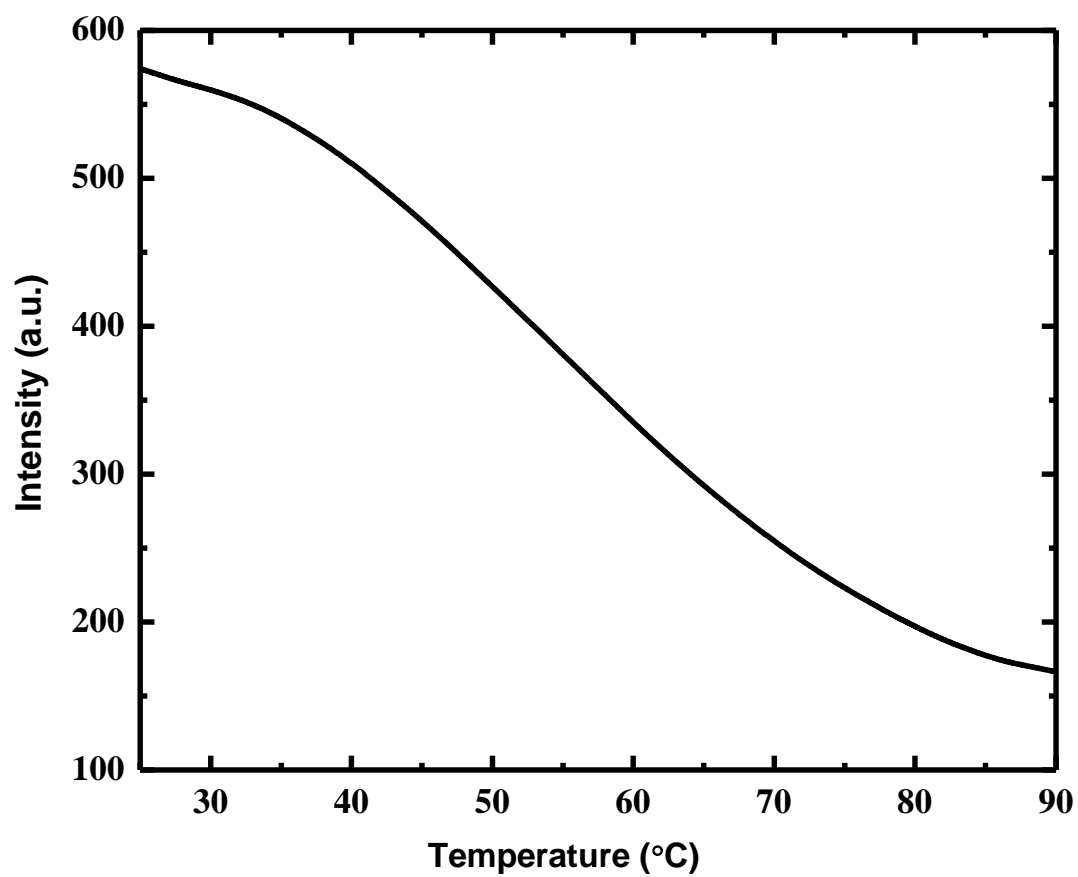

**Fig. 9S** The fluorescence intensity of Hb in the presence of TPAH.

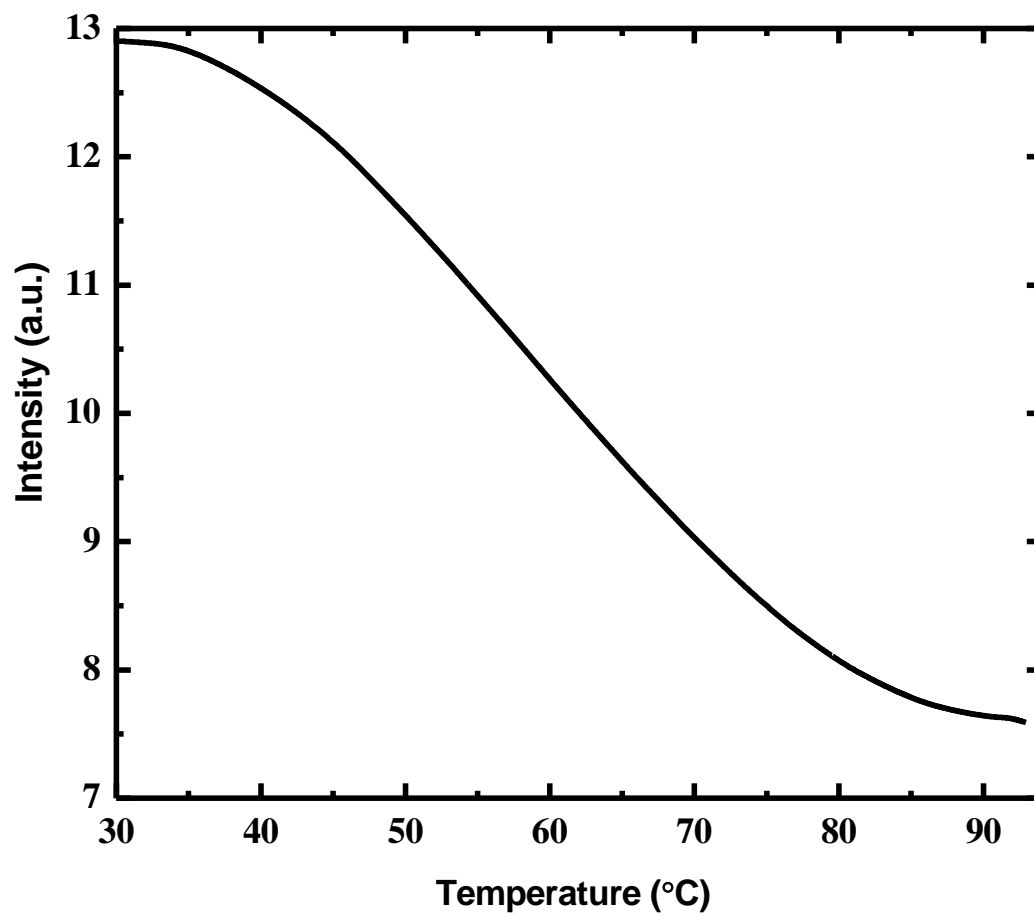

**Fig. 10S** The fluorescence intensity of Hb in the presence of TBAH.
